# Supplementary material for: North China Plain as a hot spot of ozone pollution exacerbated by extreme high temperatures
Source: Copernicus journal article supplement (doi:10.5194/acp-2021-849), 2021-11-18
Supplement: Supplementary file 1 [file acp-2021-849-supplement.pdf]

Supporting Information for

**North China Plain as a hot spot of ozone pollution exacerbated  
by extreme high temperatures**

Pinya Wang<sup>1</sup>, Yang Yang<sup>1\*</sup>, Huimin Li<sup>1</sup>, Lei Chen<sup>1</sup>, Ruijun Dang<sup>2</sup>, Daokai Xue<sup>3</sup>, Baojie Li<sup>1</sup>, Jianping  
Tang<sup>3</sup>, L. Ruby Leung<sup>4</sup>, Hong Liao<sup>1</sup>

<sup>1</sup>Jiangsu Key Laboratory of Atmospheric Environment Monitoring and Pollution  
Control, Jiangsu Collaborative Innovation Center of Atmospheric Environment and  
Equipment Technology, School of Environmental Science and Engineering, Nanjing  
University of Information Science and Technology, Nanjing, Jiangsu, China

<sup>2</sup>School of Engineering and Applied Science, Harvard University, Cambridge, MA, USA

<sup>3</sup>School of Atmospheric Sciences, Nanjing University, Nanjing, Jiangsu, China

<sup>4</sup>Atmospheric Sciences and Global Change Division, Pacific Northwest National Laboratory,  
Richland, Washington, USA

Correspondence to: Y. Yang, yang.yang@nuist.edu.cn

## **Contents of this file**

Text S1 to S2

Figures S1 to S8

Table S1 to S2

## **Text S1**

### **Evaluation of OPCs simulated by GEOS-Chem during 2014-2017.**

The GEOS-Chem simulated OPCs/OPIs during May-September 2014-2017 are identified using the same method described in Section 2 of the main text for observations. The spatial patterns of OPC and CF values of 2014-2017 are illustrated in Figure S5. The simulated OPC and CF spatial patterns are comparable to those of the observations, with higher values over the NCP region (37-41°N; 114 -120°E). The spatial correlation between the simulated and observed OPCs is higher than 0.5. The regional mean OPCs and CF values over NCP in observations are 19 days and 30%, respectively, while those in the GEOS-Chem simulation are 22 days and 35%. The model can reasonably reproduce the observed spatial patterns of OPCs and CF values and their magnitudes over NCP during 2014-2017.

## **Text S2**

### **Evaluation of OPCs in the CMIP6 simulations of present climate.**

Here, the CMIP6 simulated OPCs are again identified using the same method described in Section 2. The spatial patterns of OPC and CF during 2015-2019 in observation and CMIP6 simulations under four SSPs are illustrated in Figure S6. The simulated OPCs and CF show similar spatial patterns compared to the observations, with higher values over the NCP regions (Figure S6). The regional mean OPC and CF over NCP (37-41°N; 114 -120°E) in the observations are 28 days and 37% respectively, during 2015-2019. The multi-model ensemble mean of CMIP6 simulations can reasonably reproduce the magnitudes of OPCs and CF values over NCP, with highest values under SSP2-4.5 (34 days & 44.5%) and lowest values under SSP3-7.0 (20.3 days & 26.5%).

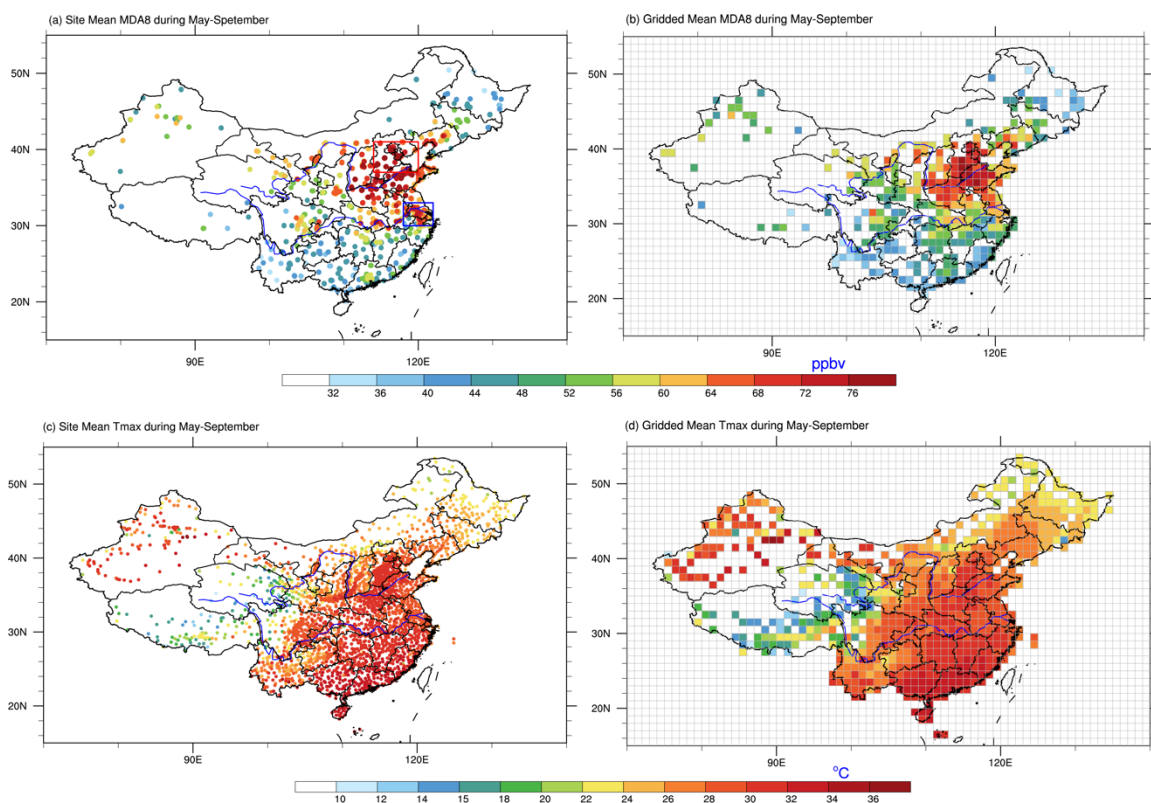

45

46 **Figure S1.** Spatial distributions of (a) site mean and (b) gridded mean MDA8 O<sub>3</sub>, and (c) site mean  
 47 and (d) gridded mean Tmax during May-September for 2014-2019. The red box and blue box in  
 48 panel (a) represent the NCP region (37-41°N; 114-120°E) and the YRD region (30-33°N; 118-  
 49 120°E), respectively.

50

51

52

53

54

55

56

57

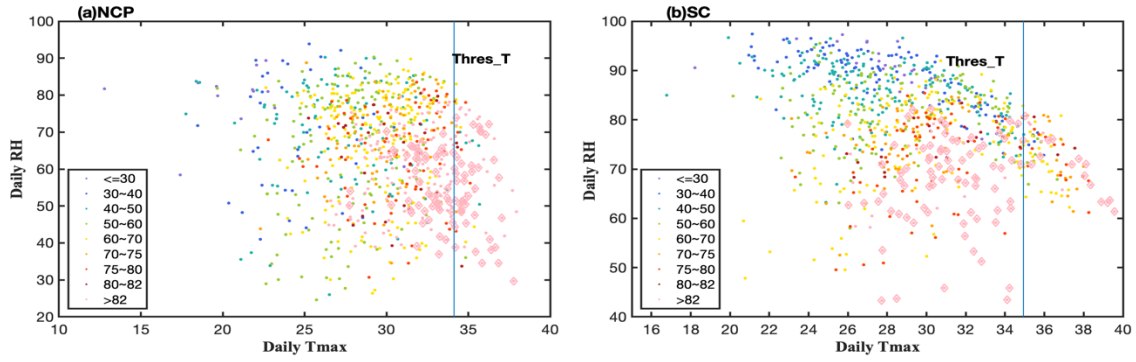

**Figure S2.** Daily MDA8 O<sub>3</sub> (ppbv, colored dots) as a function of the local daily Tmax and RH during May-September of 2014-2019 over (a) NCP (37-41°N; 114-120°E) and (b) YRD (30-33°N; 118-122°E). The larger pink squares denote the ozone pollution days with daily MDA8 O<sub>3</sub> exceeding the O<sub>3</sub> threshold. The vertical blue line denotes the threshold for extreme Tmax (Thres\_T). Thus, the larger pink squares on the right side of the blue line represent coupled extreme days OPCs.

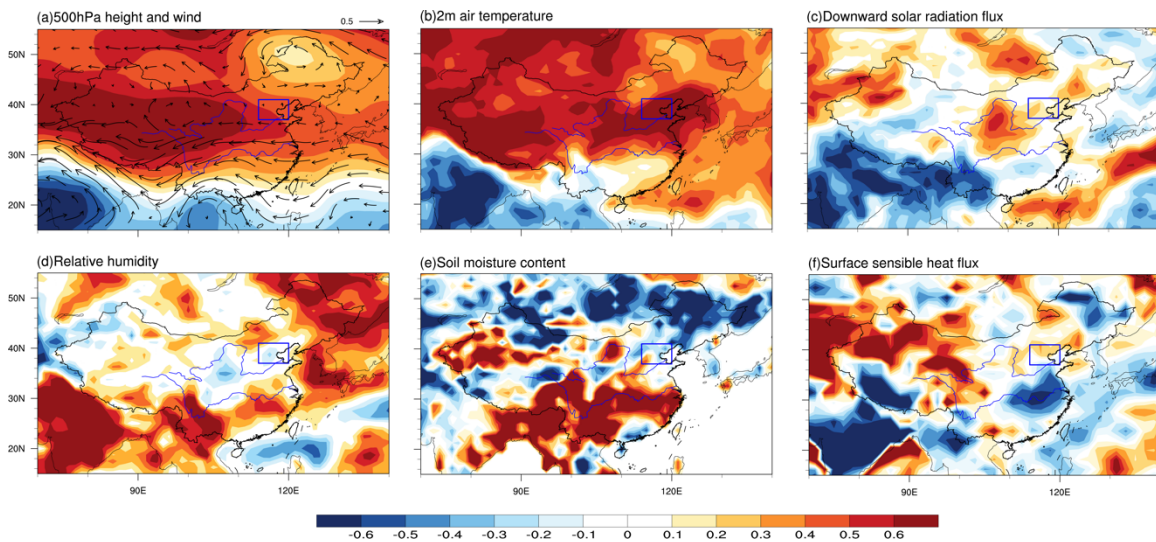

**Figure S3.** Differences between OPCs and OPIs (OPCs minus OPIs) composites of normalized anomalous (a) geopotential height and winds at 500hPa, (b) 2m air temperature, (c) downward solar radiation flux (DSR), (d) relative humidity, (e) soil moisture content, and (f) surface sensible heat flux. The blue box in each panel indicates the NCP region (37-41°N; 114-120°E).

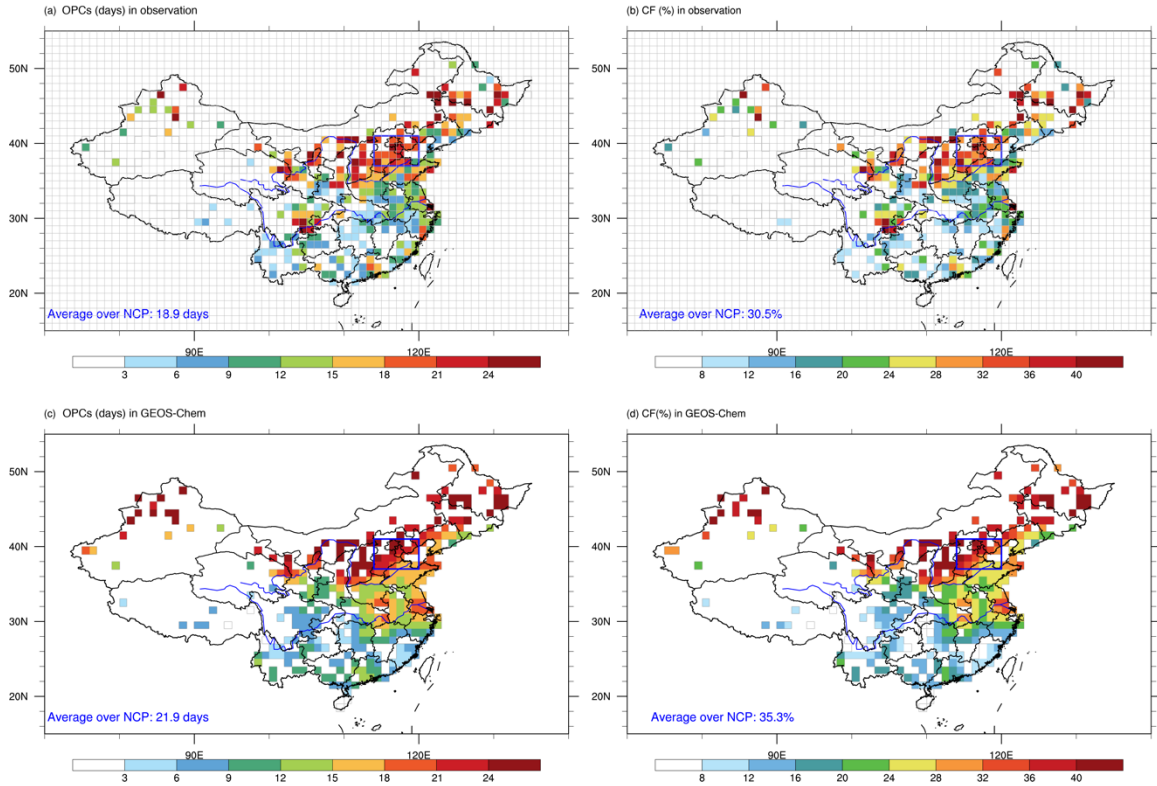

**Figure S4.** Spatial patterns of observed (a) OPCs (days) and (b) CF values (%) during May-September of 2014-2017. (c) and (d) are same as (a) and (b) but for the GEOS-Chem simulation. Observed and simulated values of OPCs(days) and CF averaged over NCP (37-41°N; 114-120°E) are indicated at the bottom left corner of each panel.

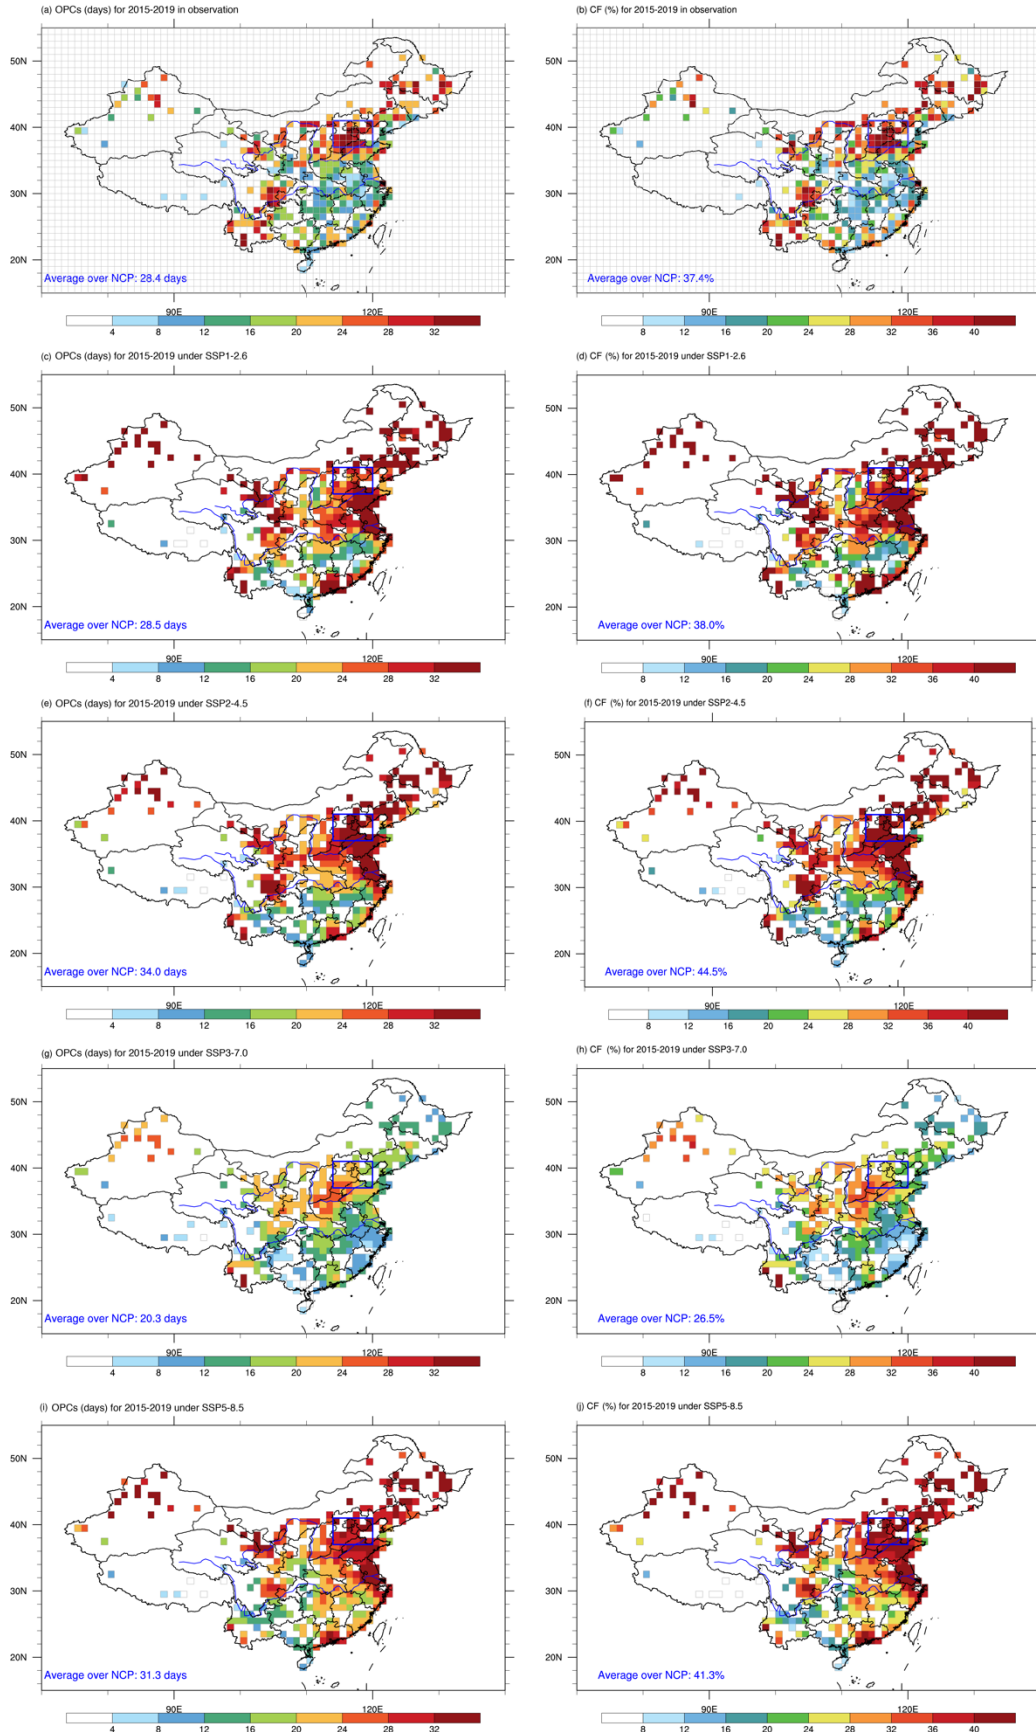

**Figure S5.** Spatial patterns of (a) OPCs (days) and (b) CF values (%) during May-September of 2015-2019 in observation; (c)~(d), (e)~(f), (g)~(h), and (g)~(h) are same as (a) and (b) but for CMIP6 simulations under SSP1-2.6, SSP2-4.5, SSP3-7.0 and SSP5-8.5, respectively. OPCs (days) and CF averaged over NCP (37-41°N; 114-120°E) are indicated at the bottom left corner of each panel.



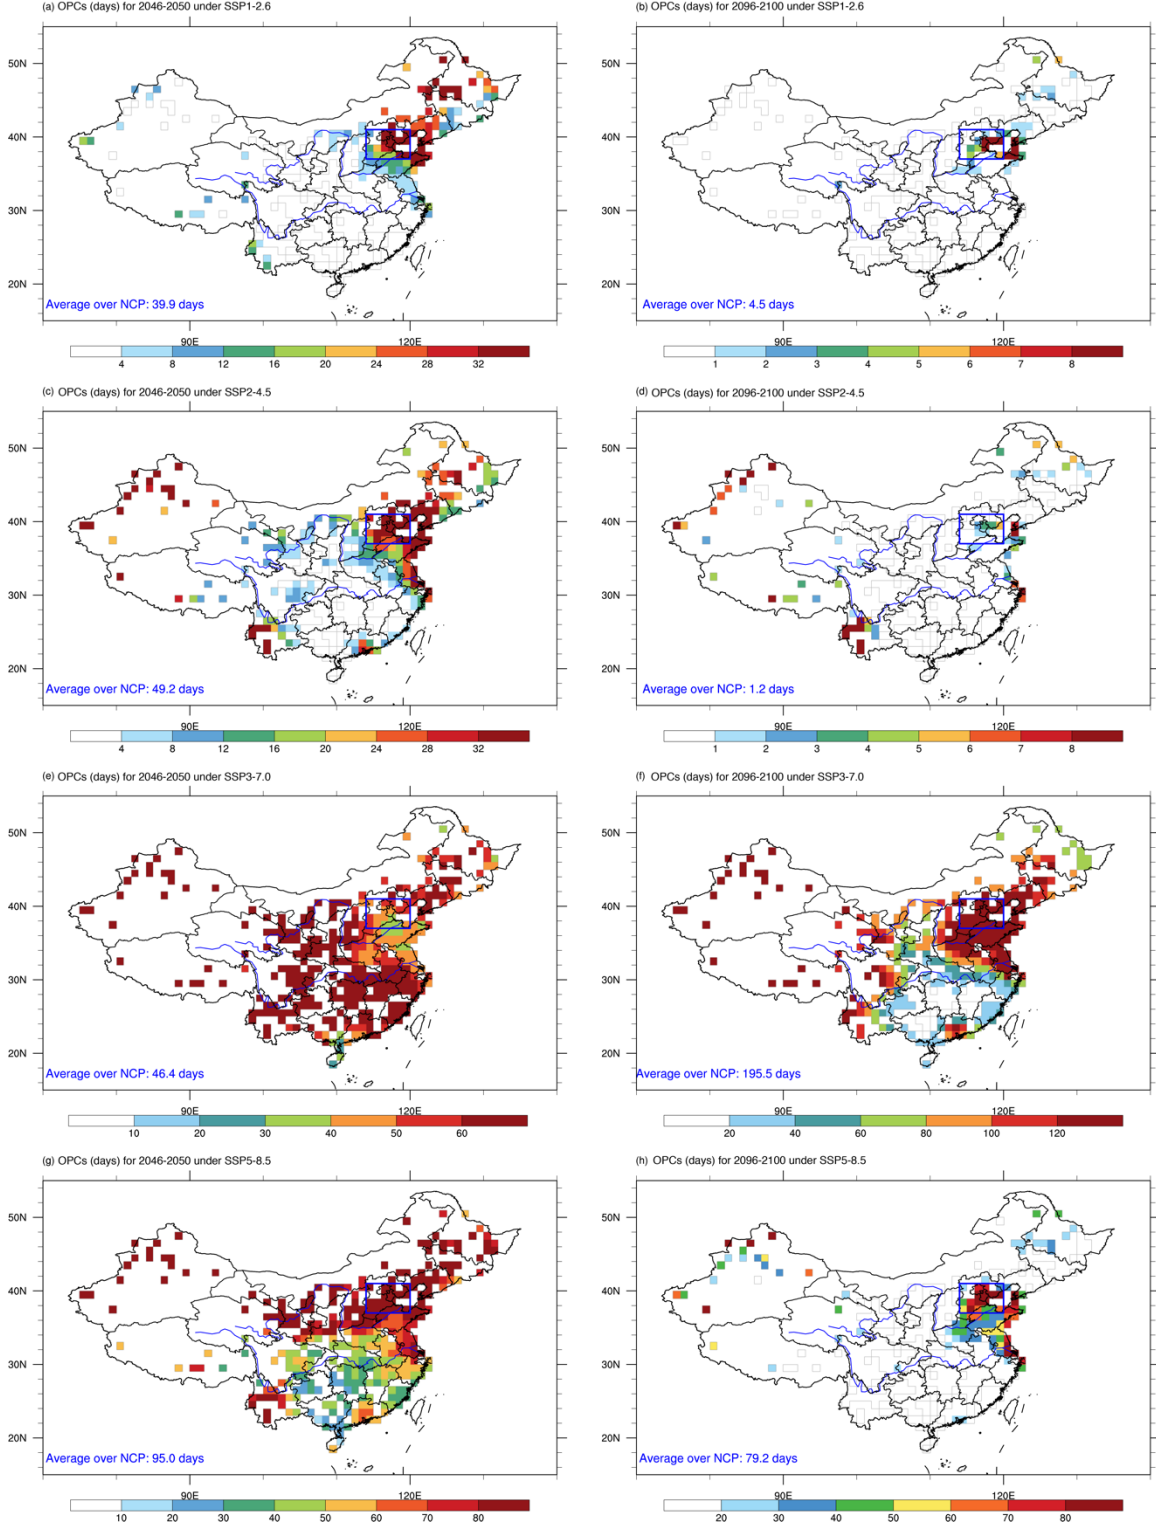

**Figure S6.** Spatial patterns of OPCs (days) during May-September in (a) 2046-2050 and (b) 2096-2100 under SSP1-2.6; (c)~(d), (e)~(f) and (g)~(h) are same as (a)~(b) but for simulations under

SSP2-4.5, SSP3-7.0 and SSP5-8.5, respectively. OPCs averaged over NCP (37-41°N; 114-120°E) are indicated at the bottom left corner of each panel.

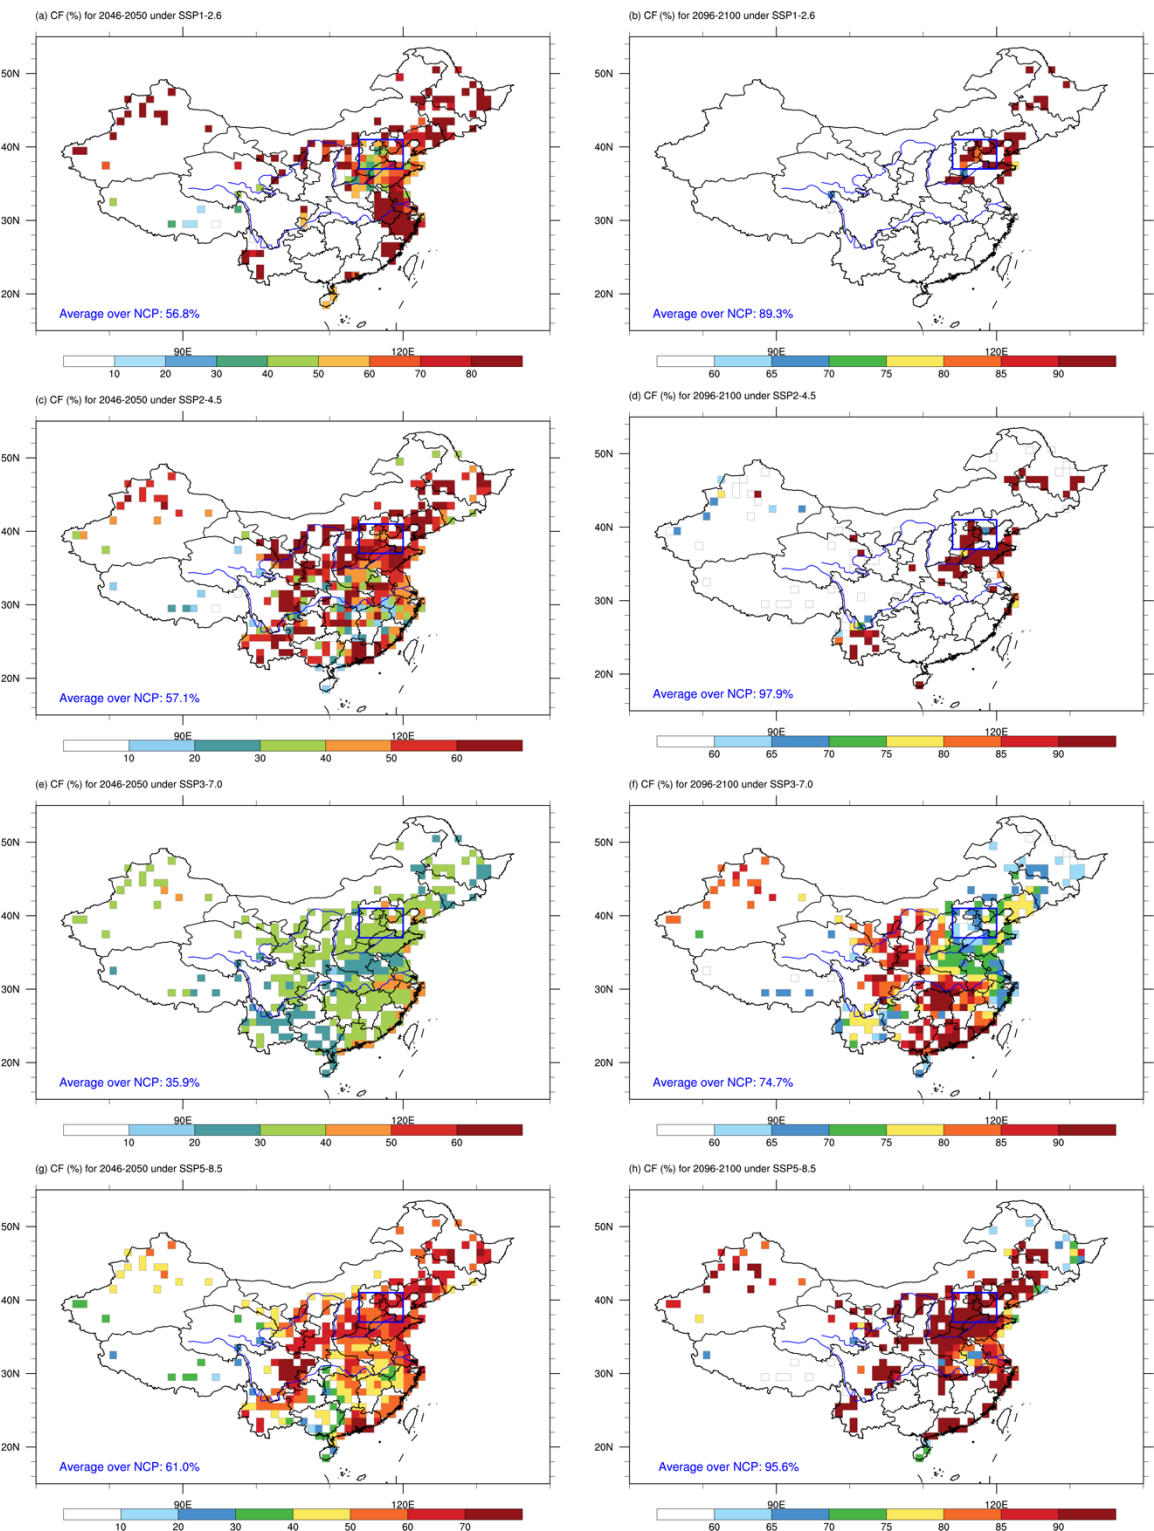

108

109 **Figure S7.** Same as Figure S6, but for CF values (%). CF values (%) averaged over NCP (37-41°N;  
 110 114-120°E) are indicated at the bottom left corner of each panel.

111

112

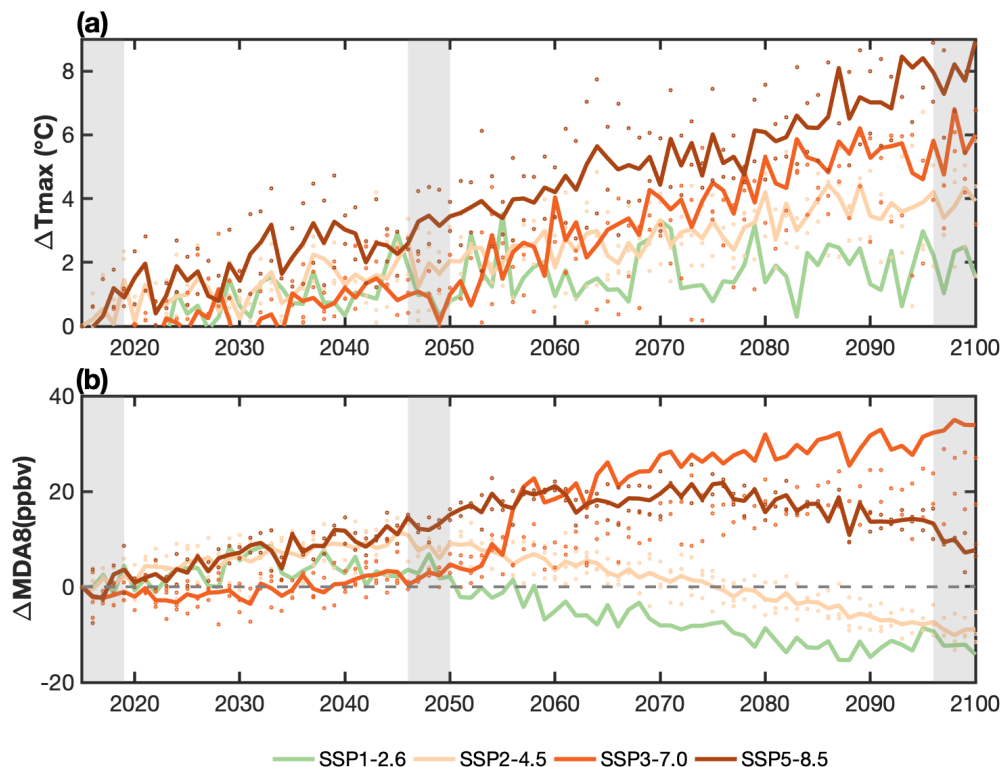

113

114 **Figure S8.** Changes in annual mean (a) Tmax and (b) MDA8 O<sub>3</sub> averaged over NCP (37-41°N;  
 115 114-120°E) relative to 2015 under SSP1-2.6, SSP2-4.5, SSP3-7.0 and SSP5-8.5. The colored lines  
 116 indicate the multi-model ensemble mean for each SSP and the scattered dots with the same color  
 117 denote results across the available CMIP6 models. The three periods of 2015 to 2019, 2046 to 2050  
 118 and 2096 to 2100 are marked with gray shading.

119

120

121

122

123 **Table S1.** Information of the CMIP6 models used in this study.

| Model             | Horizontal Resolution<br>(Lon x Lat)                               | Time<br>range | Institution         |
|-------------------|--------------------------------------------------------------------|---------------|---------------------|
| MOHC.UKESM1-0-LL  | 192 x 144                                                          | 2015-2100     | MOHC                |
| CESM2-WACCM       | 288x 144                                                           | 2015-2100     | NCAR                |
| GFDL-ESM4         | 288x180                                                            | 2015-2100     | NOAA-GFDL           |
| MPI-ESM-1-2-HAM   | 192x96                                                             | 2015-2055     | HAMMOZ-Consortium   |
| EC-Earth3-AerChem | 120x90 for O <sub>3</sub> concentration<br>512x256 for temperature | 2015-2100     | EC-Earth-Consortium |

124

125 **Table S2** Models (ticked) providing simulations for each SSP scenario. Note that most of the  
 126 adopted models provide hourly O<sub>3</sub> concentration and daily Tmax except the MOHC.UKESM1-0-  
 127 LL simulations under SSP5-8.5 provide 3-hourly surface air temperature (Tas) and the GFDL-  
 128 ESM4 simulations under SSP2-4.5 provide hourly Tas; thus, daily Tmax for the two GCMs are  
 129 derived from hourly or 3-hourly Tas.

| Model             | SSP1-2.6 | SSP2-4.5 | SSP3-7.0 | SSP5-8.5 | Citation                                 |
|-------------------|----------|----------|----------|----------|------------------------------------------|
| MOHC.UKESM1-0-LL  | √        | √        | √        | √        | Good et al. (2019)                       |
| CESM2-WACCM       |          | √        |          | √        | Danabasoglu G<br>(2019)                  |
| GFDL-ESM4         |          | √        |          |          | John et al. (2018)                       |
| MPI-ESM-1-2-HAM   |          |          | √        |          | Neubauer et al., 2019                    |
| EC-Earth3-AerChem |          |          | √        |          | EC-Earth Consortium<br>(EC-Earth) (2019) |

130

131

132 References

- 133 Consortium, E. C.-E. (2019). EC-Earth-Consortium EC-Earth3-Veg model output prepared for  
134 CMIP6 ScenarioMIP, Earth System Grid Federation.
- 135 Danabasoglu, G. (2019). NCAR CESM2-WACCM model output prepared for CMIP6  
136 ScenarioMIP, Earth System Grid Federation.
- 137 Good, P., et al. (2019). MOHC UKESM1.0-LL model output prepared for CMIP6 ScenarioMIP,  
138 Earth System Grid Federation.
- 139 John, J. G., et al. (2018). NOAA-GFDL GFDL-ESM4 model output prepared for CMIP6  
140 ScenarioMIP, Earth System Grid Federation.
- 141 Neubauer, D., et al. (2019). HAMMOZ-Consortium MPI-ESM1.2-HAM model output prepared  
142 for CMIP6 AerChemMIP, doi:10.22033/ESGF/CMIP6.1621, 2019.
